# Supplementary material for: Nectar robbing in the trainbearers ( Lesbia , Trochilidae)
Source: PeerJ journal article supplement (doi:10.7717/peerj.9561), 2020-08-12
Supplement: Igic2020_Supplementary_Table.xlsx [file Igic2020_Supplementary_Table.xlsx]

## Sheet: bill data
source	genus	species	serrate-tomia	bill-length	sex	ID	notes
FMNH	Colibri	coruscans	yes	33.18	male	CNHM179303	I.N. & B.I.
FMNH	Lesbia	nuna	no	15.5	male	FMNH46385	I.N. & B.I.
FMNH	Lesbia	nuna	no	14.71	male	FMNH222248	I.N. & B.I.
FMNH	Lesbia	nuna	no	20.08	male	FMNH222249	I.N. & B.I.
FMNH	Lesbia	nuna	no	15.75	male	FMNH222250	I.N. & B.I.
FMNH	Lesbia	nuna	no	18.74	male	FMNH222251	I.N. & B.I.
FMNH	Lesbia	nuna	no	16.11	male	FMNH222252	I.N. & B.I.
FMNH	Lesbia	nuna	NA	16.08	male	FMNH222253	bill glued/stuck together; I.N. & B.I.
FMNH	Lesbia	nuna	no	15.65	male	FMNH222254	I.N. & B.I.
FMNH	Lesbia	nuna	no	19.79	male	FMNH222255	I.N. & B.I.
FMNH	Lesbia	nuna	no	17.38	female	FMNH299096	I.N. & B.I.
FMNH	Lesbia	nuna	no	16.69	male	FMNH208193	I.N. & B.I.
FMNH	Lesbia	nuna	no	16.8	male	FMNH299095	I.N. & B.I.
FMNH	Lesbia	nuna	no	16.77	male	FMNH208194	I.N. & B.I.
FMNH	Lesbia	nuna ssp. boliviana	no	16.89	male	FMNH46392	I.N. & B.I.
FMNH	Anthracothorax	nigricollis	no	25.28	female	FMNH249566	I.N. & B.I.
FMNH	Anthracothorax	nigricollis	no	23.98	male	FMNH261018	I.N. & B.I.
FMNH	Anthracothorax	viridis	no	27.88	male	FMNH42399	I.N. & B.I.
FMNH	Damophila	julie	no	15.93	female	FMNH45943	I.N. & B.I.
FMNH	Damophila	julie	no	14.84	male	FMNH11661	I.N. & B.I.
FMNH	Heliothryx	barroti	no	24.4	female	FMNH46403	NA
FMNH	Heliothryx	barroti	no	20.57	male	FMNH57533	NA
FMNH	Lepidopyga	coeruleogularis	no	22.27	male	FMNH45852	I.N. & B.I.
FMNH	Lepidopyga	coeruleogularis	no	22.31	female	FMNH45851	I.N. & B.I.
FMNH	Phaethornis	longuemareus	no	27.09	male	FMNH293219	I.N. & B.I.
FMNH	Phaethornis	longuemareus	no	26.39	female	FMNH67512	I.N. & B.I.
FMNH	Selasphorus	flammula	no	15.8	female	FMNH46463	I.N. & B.I.
FMNH	Selasphorus	flammula	no	13.13	male	FMNH36113	I.N. & B.I.
FMNH	Thalurania	colombica	no	22.67	male	FMNH261032	I.N. & B.I.
FMNH	Thalurania	colombica	no	22.54	female	FMNH53532	I.N. & B.I.
FMNH	Ensifera	ensifera	no	80.82	male	FMNH299540	I.N. & B.I.
FMNH	Ensifera	ensifera	no	95.13	female	FMNH42762	I.N. & B.I.
FMNH	Metallura	tyrianthina	no	13.25	male	FMNH293739	I.N. & B.I.
FMNH	Metallura	tyrianthina	no	14.11	female	FMNH293741	I.N. & B.I.
FMNH	Doryfera	ludoviciae	yes	34.46	male	FMNH45485	I.N. & B.I.
FMNH	Doryfera	ludoviciae	yes	34.51	female	FMNH36106	I.N. & B.I.
FMNH	Ocreatus	underwoodii	no	14.23	male	FMNH50960	I.N. & B.I.
FMNH	Ocreatus	underwoodii	no	15	female	FMNH46264	BI/PF
FMNH	Lesbia	victoriae	no	13.9	male	FMNH220410	BI/PF
FMNH	Lesbia	victoriae	no	14.8	male	FMNH220411	BI/PF
FMNH	Lesbia	victoriae	no	15.2	female	FMNH99485	BI/PF; has single "tooth" on tomia? see photo
FMNH	Lesbia	victoriae	no	15.4	male	FMNH215612	BI/PF
FMNH	Lesbia	nuna	no	13	male	FMNH67755	BI/PF
FMNH	Lesbia	nuna	no	11.3	male	FMNH220400	maybe a female or juvenile (small tail, but labelled male)
FMNH	Lesbia	nuna	no	11	female	FMNH46387	BI/PF
FMNH	Lesbia	nuna	no	10.8	male	FMNH220404	BI/PF

## Sheet: visitation mode data
bird-genus	bird-species	bird-sex	plant-genus	plant-species	visitor-mode	mode-confidence	lat	lon	date-observation	source	source-notes	date-accessed
Lesbia	nuna	f	Abutilon	pictum	NR	H	-13.2573	-72.2628	2011-12-07	https://www.hbw.com/ibc/1107183	Tomas Grim	2019-12-27
Lesbia	nuna	m	Passiflora	tripartita var. mollissima	NR2	H	4.85459	-74.0459	2013-03-17	https://www.hbw.com/ibc/1030896	Sebastián Páramo	2019-12-27
Lesbia	nuna	m	Brugmansia	sanguinea	NR2	L	-13.2622	-72.2706	2019-01-14	pers. obs. (close to: https://www.inaturalist.org/observations/37206000)	B.I. & P.F.	NA
Lesbia	nuna	m	Fuchsia	boliviensis	NR	H	-13.2622	-72.2706	2019-01-14	https://www.inaturalist.org/observations/37206000	B.I. & P.F.	NA
Lesbia	nuna	f	Tecoma	sp.	NR	H	-13.1621	-72.5452	2018-08-18	https://www.hbw.com/ibc/photo/green-tailed-trainbearer-lesbia-nuna/green-tailed-trainbearer-lesbia-nuna-2; https://macaulaylibrary.org/asset/117117491	buchert	2019-12-29
Lesbia	nuna	f	Impatiens	sp.	P	L	4.9866	-74.2219	2019-10-19	https://www.inaturalist.org/observations/35054562		2019-12-29
Lesbia	nuna	f	Pittosporum	undulatum	NA	NA	4.67263	-74.0444	2019-09-19	https://www.inaturalist.org/observations/33044598	juan_carlos_caicedo_hernandez	2019-12-29
Lesbia	nuna	m	Digitalis	purpurea	NR	H	4.58744	-73.9511	2019-08-07	https://www.inaturalist.org/observations/30398042	juan_carlos_caicedo_hernandez	2019-12-29
Lesbia	nuna	m	Aloe	sp.	P	H	4.613	-74.0523	2019-06-10	https://www.inaturalist.org/observations/26771119	roboteatingtacos	2019-12-29
Lesbia	nuna	m	Fuchsia	boliviensis	NR2	L	4.66434	-73.9646	2018-01-19	https://www.inaturalist.org/observations/20447019	dbmcc09	2019-12-29
Lesbia	nuna	f	Fuchsia	sp.	P	L	-13.2626	-72.2677	2014-12-13	https://www.inaturalist.org/observations/31708428		2019-12-29
Lesbia	nuna	f	Salvia	leucantha	P	H	-13.2618	-72.2673	2017-11-01	https://www.inaturalist.org/observations/16954077		2019-12-29
Lesbia	nuna	f	Leonotis	leonurus	P	H	-13.5797	-71.7137	2016-04-02	https://www.inaturalist.org/observations/8842994		2019-12-29
Lesbia	nuna	f	Leonotis	leonurus	P	H	-13.4144	-71.8438	2015-06-12	https://www.inaturalist.org/observations/6073754		2019-12-29
Lesbia	nuna	f	Nicotiana	glauca	P	H	-13.5794	-71.7135	2016-08-20	https://www.inaturalist.org/observations/4133555		2019-12-29
Lesbia	nuna	f	Iochroma	sp.	P	L	NA	NA	2018-11-15	https://www.flickr.com/photos/13978985@N05/32306465988/		2019-12-29
Lesbia	nuna	m	Antirrhinum	hispanicum	NR	H	-13.254	-72.2667	2019-11-06	https://www.flickr.com/photos/schwabel/49121253766/		2019-12-29
Lesbia	nuna	f	Abutilon	sp.	NR	L	NA	NA	2015-10-11	https://www.flickr.com/photos/18682643@N08/21486671724		2019-12-29
Lesbia	nuna	f	Stachytarpheta	cayennensis	P	L	-0.004291	-78.6753	2013-08-04	https://www.flickr.com/photos/neotropical_birds_mayan_ruins/9592348396/; https://www.flickr.com/photos/neotropical_birds_mayan_ruins/9592348396/sizes/o/in/photostream/		2019-12-29
Lesbia	nuna	f	?	?	NA	H	-13.4016	-72.1284	2019-12-25	https://macaulaylibrary.org/asset/197177521		2020-01-05
Lesbia	nuna	f	Passiflora	tarminiana	P	L	-13.4016	-72.1284	2019-12-25	https://macaulaylibrary.org/asset/197177511		2020-01-05
Lesbia	nuna	m	Fuchsia	magellanica	NA	H	-13.1548	-72.5246	2012-07-13	https://macaulaylibrary.org/asset/151822031		2020-01-05
Lesbia	nuna	m	Callistemon	sp.	P/T	L	-13.2725	-72.1873	2018-08-17	https://macaulaylibrary.org/asset/114614241		2020-01-06
Lesbia	nuna	f	Leonotis	leonurus	NA	L	-13.5803	-71.7132	2016-04-02	https://macaulaylibrary.org/asset/36991981, https://macaulaylibrary.org/asset/36991991		2020-01-06
Lesbia	nuna	f	Aloe	sp.	P	H	-13.3516	-71.8933	2014-09-26	https://macaulaylibrary.org/asset/35573801		2020-01-06
Lesbia	nuna	f	Passiflora	tarminiana	NR2	L	4.4935	-73.9795	2019-03-01	https://macaulaylibrary.org/asset/192456461		2020-01-05
Lesbia	nuna	NA	Fuchsia	sp.	NR	L	4.4935	-73.9795	2019-01-03	https://macaulaylibrary.org/asset/192456481		2020-01-06
Lesbia	nuna	f	?	?	NA	L	-9.0745	-77.6448	2019-06-10	https://macaulaylibrary.org/asset/185059591		2020-01-06
Lesbia	nuna	f	Carica	papaya	P	H	4.865	-74.1272	2019-09-29	https://macaulaylibrary.org/asset/182243351		2020-01-06
Lesbia	nuna	m	Pittosporum	sp.	P/T	L	4.6731	-74.044	2019-09-19	https://macaulaylibrary.org/asset/177937401		2020-01-06
Lesbia	nuna	f	Melastomataceae	?	P/T	L	-0.1118	-78.5847	2019-08-24	https://macaulaylibrary.org/asset/174008311		2020-01-06
Lesbia	nuna	m	Stachytarpheta	sp.	P/T	H	-5.8577	-77.9847	2019-06-22	https://macaulaylibrary.org/asset/167830331		2020-01-06
Lesbia	nuna	m	Iochroma?	sp.	P	L	4.4746	-73.8753	2019-04-18	https://macaulaylibrary.org/asset/151969961		2020-01-06
Lesbia	nuna	f	Opuntia?	sp.	P	L	-13.618	-71.7304	2018-10-31	https://macaulaylibrary.org/asset/145935341		2020-01-06
Lesbia	nuna	f	Leonotis	leonurus	P	L	-13.4132	-71.8435	2015-12-06	https://macaulaylibrary.org/asset/141590941		2020-01-06
Lesbia	nuna	m	Stachytarpheta	sp.	P/T	H	-0.0099	-78.6759	2018-06-07	https://macaulaylibrary.org/asset/126159671		2020-01-06
Lesbia	nuna	m	?	?	P	H	-13.618	-71.7304	2016-01-15	https://macaulaylibrary.org/asset/125942791		2020-01-06
Lesbia	nuna	m	Alstroemeria	sp.	NA	H	-13.2624	-72.2676	2018-11-10	https://macaulaylibrary.org/asset/121119971		2020-01-06
Lesbia	nuna	m	Nicotiana	glauca	P/T	H	-13.6124	-71.7349	2018-03-09	https://macaulaylibrary.org/asset/118067351		2020-01-06
Lesbia	nuna	NA	Aloe	sp.	P/T	H	2.6115	-76.3775	2018-07-28	https://macaulaylibrary.org/asset/109264451		2020-01-06
Lesbia	nuna	m	Lantana	camara	P/T	H	-5.8577	-77.9847	2018-06-17	https://macaulaylibrary.org/asset/104836151		2020-01-06
Lesbia	nuna	m	Eucalyptus?	sp.	NA	H	-13.618	-71.7304	2018-05-16	https://macaulaylibrary.org/asset/101001501		2020-01-06
Lesbia	nuna	f	?	?	NA	L	-6.1984	-79.3045	2018-05-05	https://macaulaylibrary.org/asset/99034021		2020-01-06
Lesbia	nuna	f	Nicotiana	tomentosa	P/T	L	-13.1929	-72.5366	2012-07-27	https://macaulaylibrary.org/asset/92373321		2020-01-06
Lesbia	nuna	f	?	?	NA	H	-13.3192	-74.3422	2018-04-03	https://macaulaylibrary.org/asset/88610091		2020-01-06
Lesbia	nuna	f	?	?	P/T	L	-6.7235	-77.7981	2016-08-30	https://macaulaylibrary.org/asset/70751301		2020-01-06
Lesbia	nuna	m	Nicotiana	glauca	P/T	H	-13.5803	-71.7132	2017-08-21	https://macaulaylibrary.org/asset/68125991		2020-01-06
Lesbia	nuna	f	Aloe	sp.	NA	L	-15.2256	-68.7641	2016-04-11	https://macaulaylibrary.org/asset/60743541		2020-01-06
Lesbia	nuna	f	Lantana	camara	P/T	H	-5.824	-77.9686	2014-09-01	https://macaulaylibrary.org/asset/57333581		2020-01-06
Lesbia	nuna	f	Nicotiana	glauca	P	H	-13.3173	-71.595	2011-12-15	https://macaulaylibrary.org/asset/45599341		2020-01-06
Lesbia	nuna	m	Alstroemeria	sp.	NA	L	-13.6157	-71.735	2015-09-14	https://macaulaylibrary.org/asset/44520991		2020-01-06
Lesbia	nuna	f	Asteraceae	?	NA	H	4.7897	-73.9086	2015-12-20	https://macaulaylibrary.org/asset/42868821		2020-01-06
Lesbia	nuna	f	Lantana	camara	NA	H	-5.8577	-77.9847	2016-05-11	https://macaulaylibrary.org/asset/41925401		2020-01-06
Lesbia	nuna	m	Cestrum	sp.	NR	L	1.2623	-77.285	2016-09-13	https://macaulaylibrary.org/asset/36861491		2020-01-06
Lesbia	nuna	NA	Tecoma	stans	NA	H	2.3821	-76.4565	2016-08-18	https://macaulaylibrary.org/asset/36720891		2020-01-06
Lesbia	nuna	m	Antirrhinum	sp.	P/T	H	-13.2624	-72.2676	2016-09-20	https://macaulaylibrary.org/asset/36193301		2020-01-06
Lesbia	nuna	NA	Nicotiana	glauca	P/T	H	-13.5799	-71.7135	2016-08-20	https://macaulaylibrary.org/asset/35324961		2020-01-06
Lesbia	nuna	f	Brugmansia	aurea	NR	H	-13.2571	-72.2625	2016-02-06	https://macaulaylibrary.org/asset/31253401		2020-01-06
Lesbia	nuna	m	Solanaceae	?	P/T	H	2.5173	-76.2774	2016-05-30	https://macaulaylibrary.org/asset/29717151		2020-01-06
Lesbia	sp.	f	Callistemon	sp.	NA	NA	4.66301	-73.9766	2019-05-10	https://www.inaturalist.org/observations/24951130		2019-12-29
Lesbia	sp.	f	Callistemon	sp.	NA	NA	-0.210582	-78.4917	2019-03-01	https://www.inaturalist.org/observations/20858215		2019-12-29
Lesbia	sp.	m	Alstroemeria	sp.	P/T	H	-0.190025	-78.353	2019-03-15	https://www.inaturalist.org/observations/21269724		2019-12-29
Lesbia	sp.	f	Canna	sp.	P	L	-0.283158	-78.4676	2019-06-10	https://www.inaturalist.org/observations/26768200		2019-12-29
Lesbia	sp.	m	Iochroma	sp.	P	L	-13.4981	-72.539	2014-09-24	https://www.inaturalist.org/observations/20151750		2019-12-29
Lesbia	sp.	m	Streptosolen	jamesonii	NA	H	-13.2624	-72.2676	2019-06-12	https://macaulaylibrary.org/asset/166896711		2020-01-05
Lesbia	sp.	NA	Fuchsia	sp.	P/T	L	-13.2624	-72.2676	2018-11-04	https://macaulaylibrary.org/asset/126697011, 126697001		2020-01-06
Lesbia	sp.	f	Lantana	camara	NA	H	-5.8577	-77.9847	2018-10-27	https://macaulaylibrary.org/asset/121505871		2020-01-06
Lesbia	sp.	m	Leonotis	leonurus	NA	H	-13.5803	-71.7132	2018-07-25	https://macaulaylibrary.org/asset/111287601		2020-01-06
Lesbia	sp.	m	Abutilon	sp.	P/T	H	-13.2563	-72.2616	2016-08-30	https://macaulaylibrary.org/asset/35268121, https://macaulaylibrary.org/asset/35268131		2020-01-06
Lesbia	sp.	NA	Aloe	sp.	P/T	H	7.423	-72.543	2018-03-02	https://macaulaylibrary.org/asset/167728921		2020-01-06
Lesbia	sp.	m	Hibiscus	sp.	NA	H	-0.191	-78.3391	2014-03-29	https://macaulaylibrary.org/asset/171292601		2020-01-06
Lesbia	sp.	f	?	?	NA	H	5.2826	-73.9164	2018-09-23	https://macaulaylibrary.org/asset/160826591		2020-01-06
Lesbia	sp.	m	?	?	P/T	H	4.8798	-74.1403	2019-01-05	https://macaulaylibrary.org/asset/155356791		2020-01-06
Lesbia	sp.	m	Fuchsia	sp.	NR	L	4.6643	-73.9644	2018-01-19	https://macaulaylibrary.org/asset/141360191		2020-01-06
Lesbia	sp.	f	?	?	NR	H	4.6643	-73.9644	2018-12-25	https://macaulaylibrary.org/asset/133112531		2020-01-06
Lesbia	sp.	f	Callistemon	sp.	NA	H	5.0942	-73.5648	2018-12-22	https://macaulaylibrary.org/asset/130853001		2020-01-06
Lesbia	sp.	m	Abutilon	sp.	NR	H	4.6731	-74.044	2017-10-19	https://macaulaylibrary.org/asset/117496291		2020-01-06
Lesbia	sp.	m	Pittosporum	sp.	P/T	H	4.6743	-74.057	2017-10-21	https://macaulaylibrary.org/asset/117379591		2020-01-06
Lesbia	sp.	m	Agapanthus	sp.	P/T	H	2.6115	-76.3775	2018-07-28	https://macaulaylibrary.org/asset/109202111		2020-01-06
Lesbia	sp.	f	?	?	P/T	H	-13.2172	-71.633	2015-12-08	https://macaulaylibrary.org/asset/52104291		2020-01-06
Lesbia	sp.	f	Lantana	camara	P/T	H	-5.824	-77.9686	2010-07-22	https://macaulaylibrary.org/asset/43480441		2020-01-06
Lesbia	sp.	m	?	?	NA	H	1.1423	-76.9274	2016-11-23	https://macaulaylibrary.org/asset/41514751		2020-01-06
Lesbia	sp.	m	Fuchsia	boliviensis	NA	H	4.6334	-73.8302	2016-11-25	https://macaulaylibrary.org/asset/41086771		2020-01-06
Lesbia	sp.	NA	?	?	NR	L	-13.185	-71.5877	2016-10-06	https://macaulaylibrary.org/asset/31001691		2020-01-06
Lesbia	sp.	m	Tecoma	sp.	NA	H	-13.2864	-72.132	2016-05-04	https://macaulaylibrary.org/asset/27711771		2020-01-06
Lesbia	sp.	f	?	?	NA	H	2.2745	-76.5995	2015-03-30	https://macaulaylibrary.org/asset/24761451		2020-01-06
Lesbia	victoriae	m	Brugmansia	sanguinea	NR	H	-0.448371	-78.4301	NA	http://stockpix.com/stock/animals/birds/hummingbirds/1393.htm	Steven Holt	2019-12-27
Lesbia	victoriae	m	Brugmansia	sanguinea	NR2	H	4.6064	-74.0558	NA	https://twitter.com/diegoetorres/status/1052623106907365376	Diego Torres	2019-12-23
Lesbia	victoriae	m	Digitalis	purpurea	NR	H	4.60391	-74.0251	2019-04-14	https://www.inaturalist.org/observations/25467678	@bosquedeniebla	2019-12-29
Lesbia	victoriae	m	Abutilon	pictum	NR	H	4.67459	-74.0425	2019-05-19	https://www.inaturalist.org/observations/25395388	Felipe Arizabaleta	2019-12-29
Lesbia	victoriae	f	Salvia	leucantha	P	L	4.56046	-74.0748	2019-03-29	https://www.inaturalist.org/observations/21823865	Rafael Augusto Pinzón Salinas	2019-12-29
Lesbia	victoriae	m	Salvia	leucantha	P	H	4.60567	-74.0555	2019-02-24	https://www.inaturalist.org/observations/20990296	ismael-epm	2019-12-29
Lesbia	victoriae	m	Fuchsia	boliviensis	NR	H	5.27975	-73.4856	2018-02-03	https://www.inaturalist.org/observations/9835039		2019-12-29
Lesbia	victoriae	f	Agapanthus	sp.	T	L	-0.185727	-78.4851	2019-08-20	https://www.inaturalist.org/observations/31208388	edison10	2019-12-29
Lesbia	victoriae	f	Fuchsia	boliviensis	NR	H	-0.185727	-78.4851	2019-08-20	https://www.inaturalist.org/observations/31208388	edison10	2019-12-29
Lesbia	victoriae	f	Bejaria	resinosa	NR	H	4.97817	-73.773	2017-01-13	https://www.inaturalist.org/observations/5127401	hydaticus	2019-12-29
Lesbia	victoriae	m	Asteraceae	sp.	P/T	L	-0.866728	-78.9119	2019-02-01	https://www.inaturalist.org/observations/20390605; https://macaulaylibrary.org/asset/138400691	markdorriesfield	2019-12-29
Lesbia	victoriae	m	Fuchsia	boliviensis	NR	H	-0.294431	-78.5385	2018-06-08	https://www.inaturalist.org/observations/13502716		2019-12-29
Lesbia	victoriae	m	Tropaeolum	sp.	P/T	L	-0.294431	-78.5385	2018-06-08	https://www.inaturalist.org/observations/13502716		2019-12-29
Lesbia	victoriae	f	Agapanthus	sp.	P/T	L	-0.202761	-78.4794	2014-07-25	https://www.inaturalist.org/observations/818713		2019-12-29
Lesbia	victoriae	m	Erythrina	sp.	NR	H	-2.85	-78.9	2013-08-15	https://www.inaturalist.org/observations/1527839		2019-12-29
Lesbia	victoriae	f	Caiophora	cirsiifolia	P/T	L	-13.5668	-71.783	2015-12-04	https://www.inaturalist.org/observations/35013722		2019-12-29
Lesbia	victoriae	m	Agapanthus	sp.	P/T	L	-0.150056	-78.4949	2015-10-09	https://www.inaturalist.org/observations/2104328		2019-12-29
Lesbia	victoriae	m	Tecoma	capensis	P	L	-0.16569	-78.3612	2016-11-11	https://www.inaturalist.org/observations/4945350, https://macaulaylibrary.org/asset/45422221		2019-12-29
Lesbia	victoriae	f	Streptosolen	jamesonii	NA	NA	-13.2599	-72.2661	2019-10-09	https://www.inaturalist.org/observations/34915256		2019-12-29
Lesbia	victoriae	f	Streptosolen	jamesonii	NA	NA	4.61356	-74.0639	2018-08-13	https://www.inaturalist.org/observations/20042996		2019-12-29
Lesbia	victoriae	m	Salvia	tortuosa	NA	NA	-0.116635	-78.5234	2015-01-15	https://www.flickr.com/photos/bird_charmer/16110522488/		2019-12-29
Lesbia	victoriae	m	Lantana	camara	P	L	NA	NA	2017-10-31	https://www.flickr.com/photos/dirks_birds/24838561517/in/photolist-DQU7YD-7RNhxu-6abrk-fuQtUf-R4vUmP-sex7Fx-pQhC7G-hkhDyr-9R9Bsa-xZoLBc-xS5xok-dpSehi-Wfohxv-qi6EbT-piYBZ9-RAv4-pZqoaz-a8a2xP-c2z8M5-fuAupT-7RK2mn-Td9YTr-fv7C8j-H4LfTF-fv7YRE-2dYEzUy-vEbqDk-BkziqJ-rVU7JD-dBnUgp-DfsnC3-t78kaN-DHWpZn-6Ffhio-um7p2R-X2iQuF-6gHH7H-3ZBqg2-s5kkMb-7yQQHp-bvKoNo-wzZEB6-794vcJ-wQaxjy-qtmrwp-wT1a3p-LEJUFt-wzSss…		2019-12-29
Lesbia	victoriae	f	Brugmansia	sanguinea	NR2	L	4.60642	-74.0559	NA	https://andigenabirding.wordpress.com/tag/cerros-orientales/; https://andigenabirding.files.wordpress.com/2019/01/img_0010.jpg		2019-12-29
Lesbia	victoriae	m	Streptosolen	jamesonii	P	L	4.6028	-74.0611	2019-12-31	https://macaulaylibrary.org/asset/196848501, https://macaulaylibrary.org/asset/196848491		2020-01-05
Lesbia	victoriae	m	Ericaceae	NA	NA	H	4.6304	-73.7457	2012-07-17	https://macaulaylibrary.org/asset/196467061		2020-01-05
Lesbia	victoriae	m	Brugmansia	sanguinea	NR2	H	4.6088	-74.0586	2019-11-24	https://macaulaylibrary.org/asset/191335421, https://macaulaylibrary.org/asset/191335411, https://macaulaylibrary.org/asset/191335401, https://macaulaylibrary.org/asset/191335391		2020-01-05
Lesbia	victoriae	f	Fuchsia	boliviensis	NR2	H	-0.1865	-78.4858	2019-07-13	https://macaulaylibrary.org/asset/189920831		2020-01-05
Lesbia	victoriae	f	Callistemon	sp.	P/T	L	-0.1656	-78.3613	2019-10-28	https://macaulaylibrary.org/asset/189007671		2020-01-05
Lesbia	victoriae	f	Erythrina	sp.	NA	L	-0.1896	-78.353	2019-06-30	https://macaulaylibrary.org/asset/188863721		2020-01-05
Lesbia	victoriae	m	Brugmansia	sanguinea	NR2	L	-0.459	-78.3239	2016-02-02	https://macaulaylibrary.org/asset/185650421		2020-01-05
Lesbia	victoriae	f	Fuchsia	sp.	NR2	H	-0.1865	-78.4858	2019-09-22	https://macaulaylibrary.org/asset/183988601		2020-01-05
Lesbia	victoriae	f	Fuchsia	magellanica	P/T	H	1.1002	-77.1474	2019-08-17	https://macaulaylibrary.org/asset/179666091		2020-01-05
Lesbia	victoriae	m	?	?	NA	L	0.2053	-78.207	2019-09-14	https://macaulaylibrary.org/asset/178684581		2020-01-05
Lesbia	victoriae	NA	Agapanthus	sp.	T	L	-0.1865	-78.4858	2019-08-20	https://macaulaylibrary.org/asset/173368791, https://macaulaylibrary.org/asset/173368731, https://macaulaylibrary.org/asset/173368721, https://macaulaylibrary.org/asset/173368711, https://macaulaylibrary.org/asset/173368691, https://macaulaylibrary.org/asset/173368681		2020-01-05
Lesbia	victoriae	NA	Fuchsia	sp.	NR		-0.1865	-78.4858	2019-08-20	https://macaulaylibrary.org/asset/173368781		2020-01-05
Lesbia	victoriae	f	Monocot	sp.	P	L	-0.1968	-78.4731	2019-08-17	https://macaulaylibrary.org/asset/172908921		2020-01-05
Lesbia	victoriae	m	Salvia	leucantha	NA	L	4.6059	-74.0558	2016-01-29	https://macaulaylibrary.org/asset/171684051		2020-01-05
Lesbia	victoriae	f	Salvia	leucantha	NA	L	4.6059	-74.0558	2016-01-29	https://macaulaylibrary.org/asset/171684041		2020-01-05
Lesbia	victoriae	m	Fuchsia	sp.	NR	H	-0.1865	-78.4858	2019-07-25	https://macaulaylibrary.org/asset/169782221, https://macaulaylibrary.org/asset/169782191		2020-01-05
Lesbia	victoriae	m	Salvia	leucantha	P	H	4.6059	-74.0558	2019-07-13	https://macaulaylibrary.org/asset/168395351		2020-01-05
Lesbia	victoriae	m	?	?	P/T	H	-0.1865	-78.4858	2019-07-13	https://macaulaylibrary.org/asset/168227371, 168227361, 168227351, 16822731		2020-01-05
Lesbia	victoriae	f	Leonotis	leonurus	P	H	-0.1549	-78.3499	2019-05-17	https://macaulaylibrary.org/asset/164811591		2020-01-05
Lesbia	victoriae	f	Nicotiana	glauca	P	H	-0.1598	-78.5024	2015-03-30	https://macaulaylibrary.org/asset/163928231		2020-01-05
Lesbia	victoriae	f	Lonicera	sp.	P/T	L	-0.1826	-78.4671	2019-06-09	https://macaulaylibrary.org/asset/163486521,163486511,163486501, 163486481, ML163486471, ML163486461, ML163486451		2020-01-05
Lesbia	victoriae	f	Eucalyptus	sp.	P/T	L	-0.1968	-78.4731	2019-04-14	https://macaulaylibrary.org/asset/151099991		2020-01-05
Lesbia	victoriae	f	Tecoma	capensis	P	L	-0.182	-78.3561	2014-02-16	https://macaulaylibrary.org/asset/146233411		2020-01-05
Lesbia	victoriae	f	Canna	sp.	NA	H	-0.1896	-78.353	2019-03-16	https://macaulaylibrary.org/asset/145665811		2020-01-05
Lesbia	victoriae	f	?	?	NA	L	-0.1865	-78.4858	2009-07-25	https://macaulaylibrary.org/asset/145186931		2020-01-05
Lesbia	victoriae	m	Asteraceae	sp.	P/T	H	-0.8673	-78.914	2019-02-16	https://macaulaylibrary.org/asset/145142071		2020-01-05
Lesbia	victoriae	m	Chuquiraga	sp.	P/T	H	-3.5663	-79.4564	2019-02-23	https://macaulaylibrary.org/asset/143999311		2020-01-05
Lesbia	victoriae	f	Hibiscus	sp.	NR	L	-0.1896	-78.353	2019-02-17	https://macaulaylibrary.org/asset/143926201		2020-01-05
Lesbia	victoriae	m	Leonotis	leonurus	NA	L	-0.1896	-78.353	2019-02-06	https://macaulaylibrary.org/asset/142897541		2020-01-05
Lesbia	victoriae	f	Eucalyptus	?	P/T	L	-0.1968	-78.4731	2019-02-23	https://macaulaylibrary.org/asset/142186091		2020-01-05
Lesbia	victoriae	m	Abutilon	sp.	NR	L	-0.166	-78.3607	2016-08-25	https://macaulaylibrary.org/asset/139858371, 139858281, 139858291		2020-01-06
Lesbia	victoriae	m	Abutilon	sp.	NR	L	-0.166	-78.3607	2016-08-25	https://macaulaylibrary.org/asset/139858061		2020-01-06
Lesbia	victoriae	m	Leonotis	leonurus	P/T	L	-0.1896	-78.353	2019-02-06	https://macaulaylibrary.org/asset/139358071		2020-01-06
Lesbia	victoriae	f	Callistemon	sp.	NA	H	-0.1896	-78.353	2018-07-07	https://macaulaylibrary.org/asset/137629631		2020-01-06
Lesbia	victoriae	m	Abutilon	sp.	NR	H	4.1475	-74.1733	2019-01-15	https://macaulaylibrary.org/asset/137271611, 137271591		2020-01-06
Lesbia	victoriae	m	Abutilon	sp.	NR	H	-0.1656	-78.3613	2016-08-24	https://macaulaylibrary.org/asset/135230291		2020-01-06
Lesbia	victoriae	m	Abutilon	sp.	NR	H	-0.1656	-78.3613	2016-08-24	https://macaulaylibrary.org/asset/135230131		2020-01-06
Lesbia	victoriae	m	Abutilon	sp.	NR	H	-0.1656	-78.3613	2016-08-24	https://macaulaylibrary.org/asset/135230041		2020-01-06
Lesbia	victoriae	f	Leonotis	leonurus	P	L	-0.1656	-78.3613	2018-12-01	https://macaulaylibrary.org/asset/130315381		2020-01-06
Lesbia	victoriae	m	Tecoma	capensis	P/T	L	-0.1656	-78.3613	2018-07-02	https://macaulaylibrary.org/asset/125125921		2020-01-06
Lesbia	victoriae	m	Callistemon	sp.	P/T	L	-0.1656	-78.3613	2018-10-22	https://macaulaylibrary.org/asset/124970251		2020-01-06
Lesbia	victoriae	m	Fuchsia	sp.	NR	L	-0.1865	-78.4858	2018-10-29	https://macaulaylibrary.org/asset/123466871		2020-01-06
Lesbia	victoriae	f	Fuchsia	sp.	NR	L	-0.1865	-78.4858	2018-10-26	https://macaulaylibrary.org/asset/120687071		2020-01-06
Lesbia	victoriae	m	Aloe	?	NR	H	1.1893	-77.2769	2018-10-13	https://macaulaylibrary.org/asset/118697951		2020-01-06
Lesbia	victoriae	m	?	?	NA	L	-0.2315	-78.5203	2018-08-24	https://macaulaylibrary.org/asset/113197011		2020-01-06
Lesbia	victoriae	m	Vinca	major	NA	H	-0.1656	-78.3613	2018-06-23	https://macaulaylibrary.org/asset/108479891		2020-01-06
Lesbia	victoriae	m	Salvia	leucantha	P	L	4.6059	-74.0558	2018-07-14	https://macaulaylibrary.org/asset/107628801		2020-01-06
Lesbia	victoriae	m	Brugmansia	sanguinea	NR	H	-0.1165	-78.5234	2018-06-02	https://macaulaylibrary.org/asset/107502031		2020-01-06
Lesbia	victoriae	m	?	?	NA	L	-0.4591	-78.3232	2018-06-29	https://macaulaylibrary.org/asset/105994141		2020-01-06
Lesbia	victoriae	m	Salvia	leucantha	P	H	4.7211	-73.9674	2017-11-15	https://macaulaylibrary.org/asset/103234091		2020-01-06
Lesbia	victoriae	m	Fuchsia	sp.	NR	L	-0.1865	-78.4858	2018-04-14	https://macaulaylibrary.org/asset/97729801		2020-01-06
Lesbia	victoriae	m	Lantana	camara	P/T	L	-5.8577	-77.9847	2018-01-22	https://macaulaylibrary.org/asset/97116901		2020-01-06
Lesbia	victoriae	m	Fuchsia	magellanica	P/T	H	-0.1865	-78.4858	2018-03-23	https://macaulaylibrary.org/asset/93983191		2020-01-06
Lesbia	victoriae	f	Callistemon	sp.	NA	H	-1.6746	-78.6479	2017-11-14	https://macaulaylibrary.org/asset/77486291		2020-01-06
Lesbia	victoriae	f	Fuchsia	boliviensis	NA	H	-0.1865	-78.4858	2017-10-18	https://macaulaylibrary.org/asset/76402391		2020-01-06
Lesbia	victoriae	NA	Dunalia?	sp.	P	H	-13.4377	-71.6515	2016-10-08	https://macaulaylibrary.org/asset/75949301		2020-01-06
Lesbia	victoriae	m	Fuchsia	sp.	NR	L	-0.1865	-78.4858	2017-11-15	https://macaulaylibrary.org/asset/75591711		2020-01-06
Lesbia	victoriae	m	Salvia	leucantha	P	H	-13.2624	-72.2676	2017-10-06	https://macaulaylibrary.org/asset/72212221		2020-01-06
Lesbia	victoriae	f	?	?	NA	H	-0.1826	-78.4671	2017-10-16	https://macaulaylibrary.org/asset/72142631		2020-01-06
Lesbia	victoriae	m	?	?	P/T	H	4.2863	-74.2082	2017-05-28	https://macaulaylibrary.org/asset/59682361		2020-01-06
Lesbia	victoriae	m	Fuchsia	boliviensis	NR	H	4.6059	-74.0558	2015-07-28	https://macaulaylibrary.org/asset/57771531		2020-01-06
Lesbia	victoriae	m	Salvia	leucantha	P	H	4.6059	-74.0558	2017-04-27	https://macaulaylibrary.org/asset/56901601		2020-01-06
Lesbia	victoriae	m	Cavendishia	sp.	P	H	4.8583	-73.8751	2017-03-19	https://macaulaylibrary.org/asset/51935521		2020-01-06
Lesbia	victoriae	m	?	?	NA	L	-5.1169	-79.6117	2017-02-23	https://macaulaylibrary.org/asset/49634301		2020-01-06
Lesbia	victoriae	m	Chuquiraga	sp.	P/T	H	-0.4608	-78.3098	2014-11-18	https://macaulaylibrary.org/asset/44029201		2020-01-06
Lesbia	victoriae	f	Agapanthus	sp.	P/T	L	-0.1737	-78.3605	2016-11-06	https://macaulaylibrary.org/asset/42844461		2020-01-06
Lesbia	victoriae	m	Fuchsia	boliviensis	NR	H	-0.1865	-78.4858	2014-02-20	https://macaulaylibrary.org/asset/38713351, https://macaulaylibrary.org/asset/38713321		2020-01-06
Lesbia	victoriae	m	Abutilon	pictum	NR	H	-0.1656	-78.3613	2016-08-25	https://macaulaylibrary.org/asset/34659261, https://macaulaylibrary.org/asset/34710241		2020-01-06
Lesbia	victoriae	m	Fuchsia	sp.	NR	L	-0.1865	-78.4858	2016-07-17	https://macaulaylibrary.org/asset/32581141		2020-01-06
Lesbia	victoriae	m	Brugmansia	sanguinea	NR	H	-0.5139	-78.1866	2016-02-02	https://macaulaylibrary.org/asset/23968551		2020-01-06
Lesbia	victoriae	f	?	?	P/T	H	-0.1865	-78.4858	2015-10-29	https://macaulaylibrary.org/asset/20631781		2020-01-06
