# Supplementary material for: Nectar robbing in the trainbearers ( Lesbia , Trochilidae)
Source: PeerJ journal article supplement (doi:10.7717/peerj.9561), 2020-08-12
Supplement: mosaic-plot-v3.pdf [file mosaic-plot-v3.pdf]

# Foraging Mode

## Species

*nuna*

*victoriae*

Pollination/Thieving

Robbing

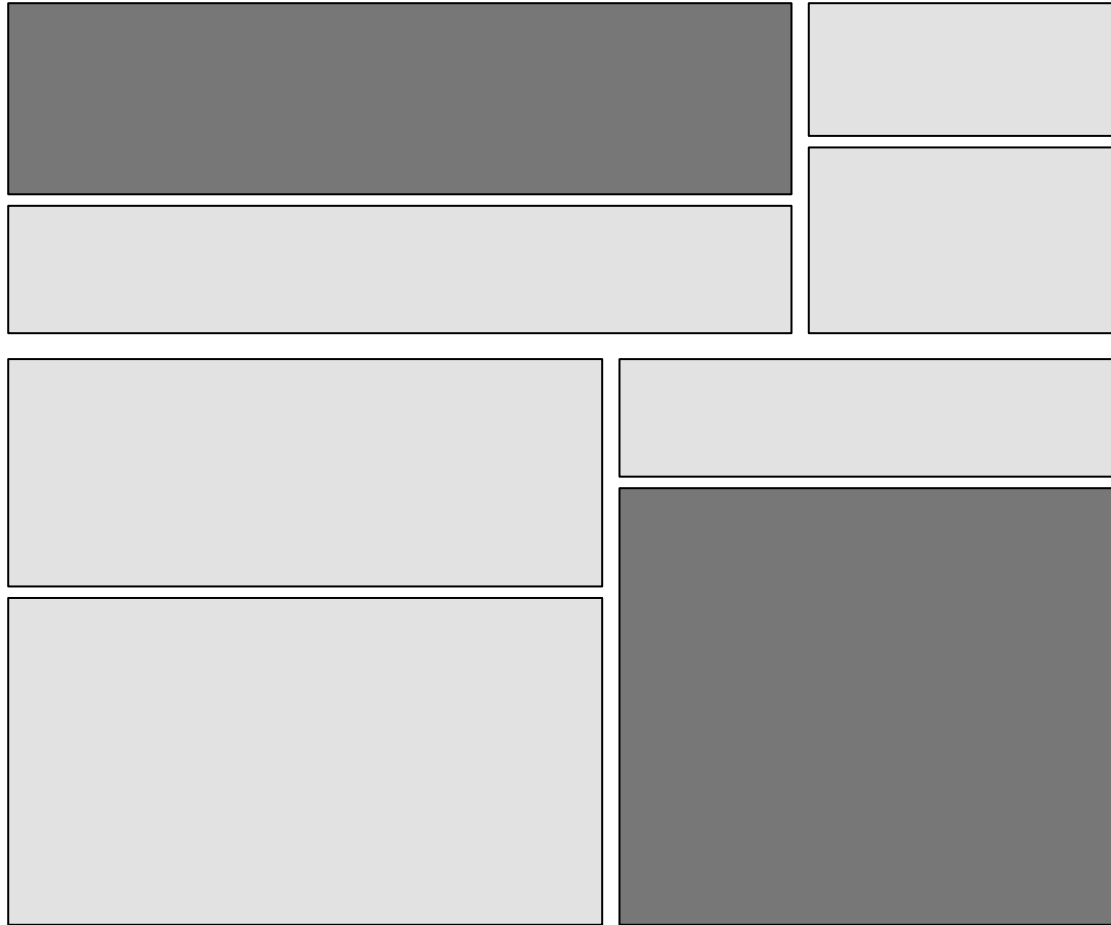

Female

Male

Female

Male

**Sex**

Pearson residuals:

2.4

2.0

0.0

-1.3

p-value =  
0.0051
